# Supplementary material for: Light-Irradiation Wavelength and Intensity Changes Influence Aflatoxin Synthesis in Fungi
Source: PubMed Central journal article supplement (PMC5793118; doi:10.3390/toxins10010031), 2018-01-05
Supplement: toxins-10-00031-s001.pdf [file toxins-10-00031-s001.pdf]

# Supplementary Materials: Light-Irradiation Wavelength and Intensity Changes Influence Aflatoxin Synthesis in Fungi

Tadahiro Suzuki

(a)

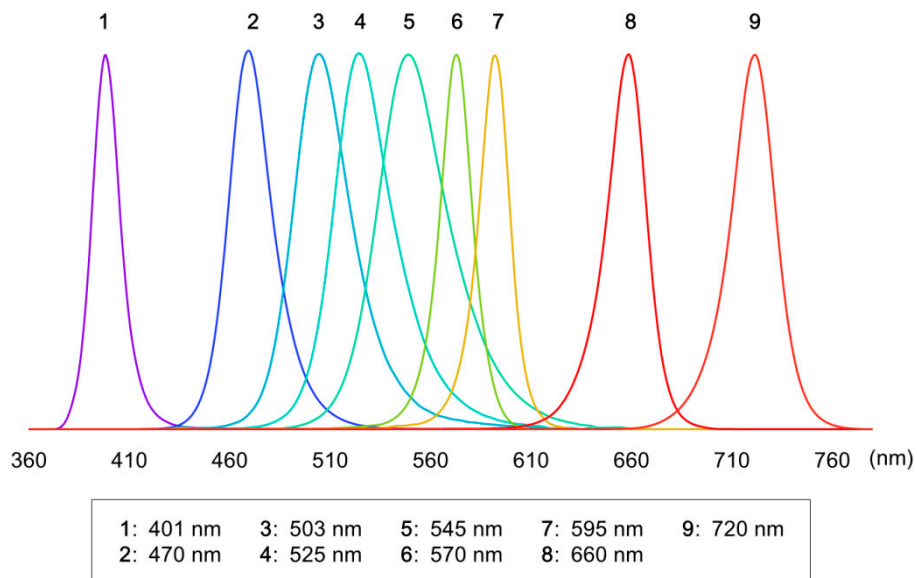

(b)

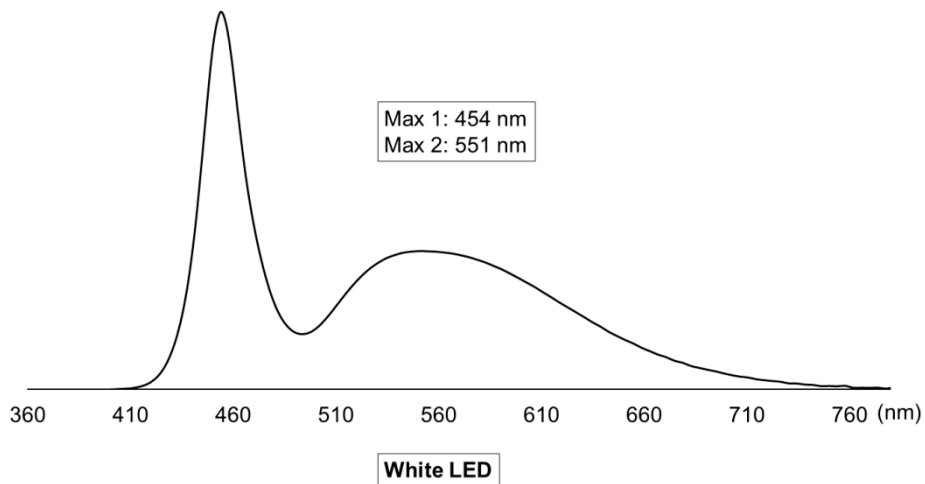

**Figure S1.** Light spectra used in this study. (a) Spectral characteristics of single wavelength light emitting diodes (LEDs). (b) Spectral characteristics of the white LED. Each spectrum was constructed by summing the spectral irradiances per 1 nm.

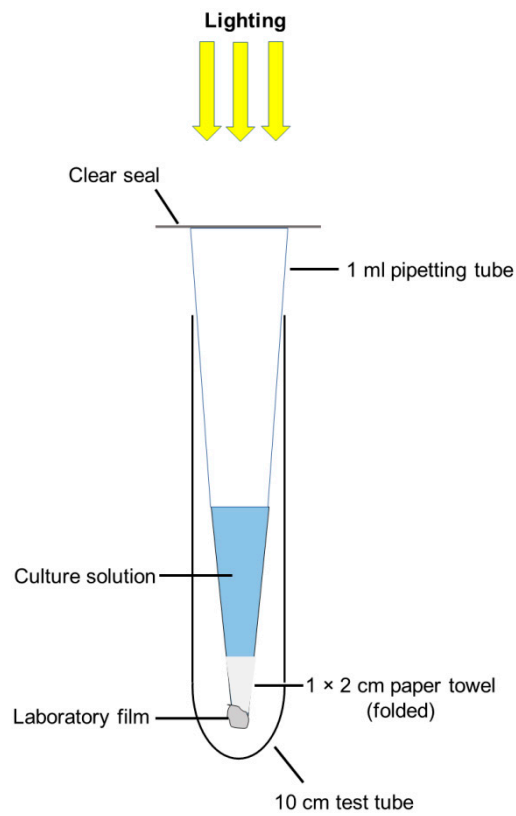

**Figure S2.** Diagrammatic illustration of the modified tip-culture method. The culture tip was placed under light irradiation at various settings and incubated without shaking. The light source was set at a distance of 15 cm from the surface of the culture solution.

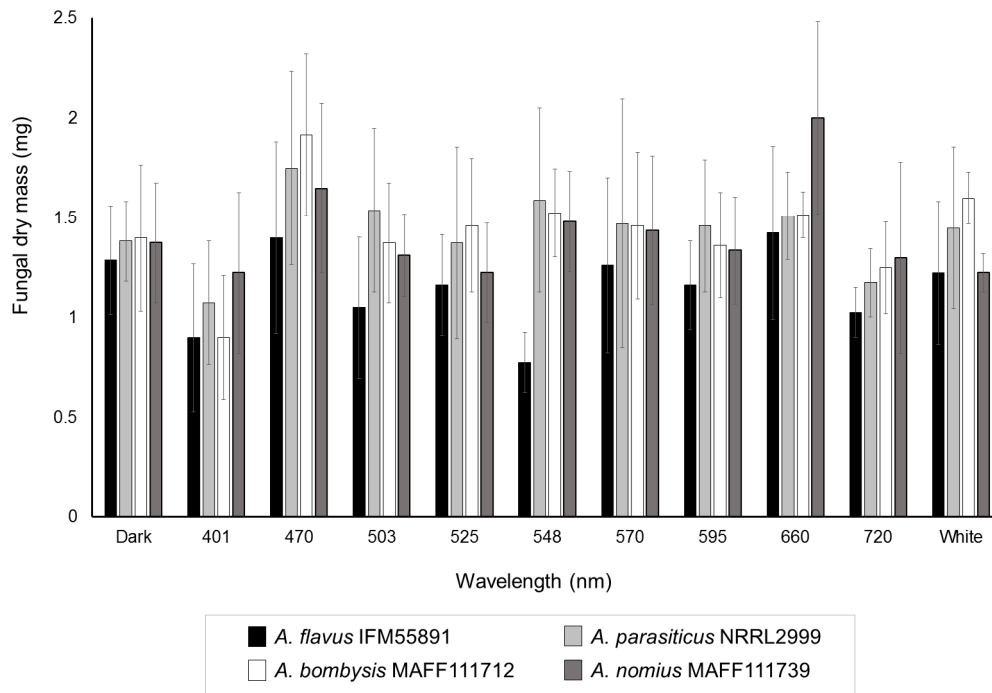

**Figure S3.** Changes in fungal dry mass after a 3-d incubation period in liquid culture media at the 4  $\mu\text{mol}\cdot\text{m}^{-2}\cdot\text{s}^{-1}$  setting. Only 401, 548 and 720 nm for *A. flavus* IFM55891, 720 nm for *A. parasiticus* NRRL2999, and 660 nm for *A. nomius* MAFF111739 showed significant differences compared with dark conditions ( $P < 0.05$ ). Bars indicate standard deviation;  $n = 3-6$ .

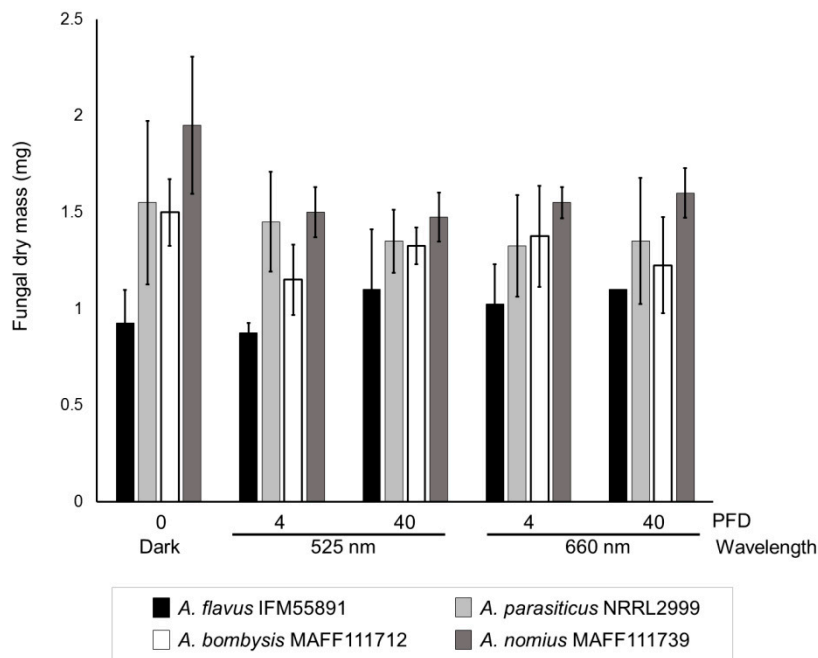

**Figure S4.** Changes in fungal dry mass after a 3-d incubation period in liquid culture media. Settings of 4 and 40  $\mu\text{mol}\cdot\text{m}^{-2}\cdot\text{s}^{-1}$  at 525 and 660 nm were applied, except under dark conditions. Only 4  $\mu\text{mol}\cdot\text{m}^{-2}\cdot\text{s}^{-1}$  at 525-nm conditions in *A. bombyasis* MAFF111712 showed a significant decrease compared with dark conditions ( $P < 0.05$ ). Bars indicate standard deviation;  $n = 4$ .

**Table S1.** Aflatoxin concentrations per amount (mg·L<sup>-1</sup>) synthesized after a 3-d incubation period in liquid culture media.

|            | (nm)  | AFG <sub>1</sub> | AFB <sub>1</sub> | AFG <sub>2</sub> | AFB <sub>2</sub> |
|------------|-------|------------------|------------------|------------------|------------------|
| IFM55891   | Dark  | -                | 1.348 ± 0.292    | -                | 0.037 ± 0.009    |
|            | 401   | -                | 0.994 ± 0.230    | -                | 0.037 ± 0.007    |
|            | 470   | -                | 1.877 ± 0.239    | -                | 0.057 ± 0.014    |
|            | 503   | -                | 1.974 ± 0.387    | -                | 0.054 ± 0.019    |
|            | 525   | -                | 2.141 ± 0.277    | -                | 0.060 ± 0.012    |
|            | 548   | -                | 1.900 ± 0.416    | -                | 0.058 ± 0.013    |
|            | 570   | -                | 1.064 ± 0.157    | -                | 0.032 ± 0.010    |
|            | 595   | -                | 1.383 ± 0.379    | -                | 0.038 ± 0.009    |
|            | 660   | -                | 1.196 ± 0.229    | -                | 0.038 ± 0.009    |
|            | 720   | -                | 1.946 ± 0.425    | -                | 0.054 ± 0.003    |
|            | White | -                | 1.667 ± 0.426    | -                | 0.056 ± 0.012    |
| NRRL2999   | Dark  | 6.521 ± 1.734    | 1.200 ± 0.450    | 0.163 ± 0.020    | 0.047 ± 0.009    |
|            | 401   | 3.630 ± 0.967    | 0.388 ± 0.147    | 0.141 ± 0.020    | 0.023 ± 0.005    |
|            | 470   | 6.721 ± 1.008    | 1.205 ± 0.394    | 0.193 ± 0.012    | 0.062 ± 0.014    |
|            | 503   | 8.345 ± 1.909    | 1.616 ± 0.610    | 0.200 ± 0.055    | 0.063 ± 0.015    |
|            | 525   | 7.131 ± 0.878    | 1.210 ± 0.367    | 0.203 ± 0.038    | 0.056 ± 0.008    |
|            | 548   | 4.863 ± 0.976    | 0.691 ± 0.199    | 0.182 ± 0.033    | 0.043 ± 0.010    |
|            | 570   | 3.861 ± 1.475    | 0.498 ± 0.258    | 0.152 ± 0.042    | 0.033 ± 0.011    |
|            | 595   | 5.106 ± 1.218    | 0.676 ± 0.176    | 0.191 ± 0.036    | 0.040 ± 0.010    |
|            | 660   | 4.670 ± 1.368    | 0.578 ± 0.158    | 0.191 ± 0.046    | 0.043 ± 0.010    |
|            | 720   | 4.840 ± 1.954    | 0.490 ± 0.689    | 0.151 ± 0.022    | 0.026 ± 0.017    |
|            | White | 7.302 ± 2.475    | 1.526 ± 0.812    | 0.189 ± 0.040    | 0.067 ± 0.025    |
| MAFF111712 | Dark  | 4.018 ± 0.231    | 1.943 ± 0.206    | 0.026 ± 0.002    | 0.028 ± 0.005    |
|            | 401   | 2.375 ± 1.402    | 1.158 ± 0.937    | 0.035 ± 0.007    | 0.036 ± 0.021    |
|            | 470   | 5.253 ± 2.300    | 3.710 ± 1.029    | 0.041 ± 0.016    | 0.055 ± 0.014    |
|            | 503   | 5.301 ± 0.313    | 3.414 ± 0.459    | 0.042 ± 0.005    | 0.054 ± 0.006    |
|            | 525   | 4.918 ± 0.484    | 3.224 ± 0.414    | 0.038 ± 0.004    | 0.055 ± 0.005    |
|            | 548   | 5.315 ± 0.819    | 2.950 ± 0.576    | 0.043 ± 0.008    | 0.051 ± 0.009    |
|            | 570   | 4.002 ± 0.567    | 1.906 ± 0.249    | 0.031 ± 0.002    | 0.033 ± 0.001    |
|            | 595   | 3.302 ± 0.294    | 1.493 ± 0.051    | 0.026 ± 0.004    | 0.026 ± 0.002    |
|            | 660   | 4.839 ± 0.378    | 2.372 ± 0.146    | 0.034 ± 0.006    | 0.033 ± 0.003    |
|            | 720   | 4.990 ± 1.802    | 2.835 ± 0.785    | 0.026 ± 0.012    | 0.032 ± 0.010    |
|            | White | 4.805 ± 0.390    | 3.213 ± 0.223    | 0.040 ± 0.002    | 0.050 ± 0.005    |
| MAFF111739 | Dark  | 0.347 ± 0.054    | 0.866 ± 0.074    | 0.001 ± 0.000    | 0.003 ± 0.001    |
|            | 401   | 1.382 ± 0.547    | 1.382 ± 0.705    | 0.005 ± 0.002    | 0.017 ± 0.005    |
|            | 470   | 2.207 ± 0.567    | 4.635 ± 1.072    | 0.007 ± 0.001    | 0.027 ± 0.004    |
|            | 503   | 1.877 ± 0.283    | 4.804 ± 0.384    | 0.005 ± 0.001    | 0.027 ± 0.001    |
|            | 525   | 1.790 ± 0.216    | 3.961 ± 0.202    | 0.005 ± 0.001    | 0.023 ± 0.005    |
|            | 548   | 1.811 ± 0.204    | 3.787 ± 0.098    | 0.006 ± 0.001    | 0.021 ± 0.002    |
|            | 570   | 1.299 ± 0.358    | 2.315 ± 0.836    | 0.006 ± 0.001    | 0.020 ± 0.007    |
|            | 595   | 1.180 ± 0.348    | 1.727 ± 0.232    | 0.004 ± 0.001    | 0.008 ± 0.002    |
|            | 660   | 0.831 ± 0.454    | 1.557 ± 0.748    | 0.002 ± 0.002    | 0.007 ± 0.004    |
|            | 720   | 1.611 ± 0.192    | 2.235 ± 0.447    | 0.006 ± 0.000    | 0.012 ± 0.002    |
|            | White | 1.783 ± 0.213    | 3.911 ± 0.630    | 0.007 ± 0.001    | 0.028 ± 0.001    |

Hyphen: no AF synthesis detected. Averages ± standard deviation. *n* = 3–6.

**Table S2.** Aflatoxin concentrations per amount ( $\text{mg}\cdot\text{L}^{-1}$ ) synthesized after a 3-d incubation period in liquid culture media.

|            |      | PFD               | AFG <sub>1</sub>  | AFB <sub>1</sub>  | AFG <sub>2</sub>  | AFB <sub>2</sub>  |
|------------|------|-------------------|-------------------|-------------------|-------------------|-------------------|
| IFM55891   | Dark | 0                 | -                 | $0.395 \pm 0.086$ | -                 | $0.010 \pm 0.002$ |
|            |      |                   |                   | 525 nm            |                   |                   |
|            |      | 4                 | -                 | $0.849 \pm 0.171$ | -                 | $0.024 \pm 0.006$ |
|            |      | 40                | -                 | $0.699 \pm 0.216$ | -                 | $0.019 \pm 0.009$ |
|            |      |                   |                   | 660 nm            |                   |                   |
|            |      | 4                 | -                 | $0.534 \pm 0.077$ | -                 | $0.016 \pm 0.003$ |
| NRRL2999   | Dark | 0                 | $6.806 \pm 1.235$ | $1.025 \pm 0.273$ | $0.219 \pm 0.019$ | $0.053 \pm 0.006$ |
|            |      |                   |                   | 525 nm            |                   |                   |
|            |      | 4                 | $6.848 \pm 1.633$ | $1.124 \pm 0.516$ | $0.182 \pm 0.042$ | $0.050 \pm 0.007$ |
|            |      | 40                | $4.787 \pm 1.235$ | $0.910 \pm 0.187$ | $0.141 \pm 0.034$ | $0.049 \pm 0.007$ |
|            |      |                   |                   | 660 nm            |                   |                   |
|            |      | 4                 | $4.401 \pm 0.373$ | $0.732 \pm 0.326$ | $0.152 \pm 0.049$ | $0.041 \pm 0.011$ |
| MAFF111712 | Dark | 0                 | $4.749 \pm 0.697$ | $2.615 \pm 0.354$ | $0.033 \pm 0.004$ | $0.035 \pm 0.007$ |
|            |      |                   |                   | 525 nm            |                   |                   |
|            |      | 4                 | $4.746 \pm 0.488$ | $3.725 \pm 0.837$ | $0.040 \pm 0.005$ | $0.059 \pm 0.006$ |
|            |      | 40                | $4.527 \pm 0.678$ | $3.410 \pm 0.584$ | $0.044 \pm 0.005$ | $0.065 \pm 0.005$ |
|            |      |                   |                   | 660 nm            |                   |                   |
|            |      | 4                 | $4.693 \pm 1.412$ | $2.796 \pm 0.823$ | $0.038 \pm 0.006$ | $0.041 \pm 0.010$ |
| MAFF111739 | Dark | 0                 | $0.990 \pm 0.369$ | $1.882 \pm 0.555$ | $0.003 \pm 0.001$ | $0.010 \pm 0.004$ |
|            |      |                   |                   | 525 nm            |                   |                   |
|            |      | 4                 | $1.803 \pm 0.177$ | $4.120 \pm 0.174$ | $0.008 \pm 0.001$ | $0.029 \pm 0.002$ |
|            |      | 40                | $1.861 \pm 0.365$ | $4.545 \pm 0.498$ | $0.009 \pm 0.002$ | $0.030 \pm 0.009$ |
|            |      |                   |                   | 660 nm            |                   |                   |
|            |      | 4                 | $1.103 \pm 0.366$ | $2.638 \pm 0.396$ | $0.006 \pm 0.001$ | $0.016 \pm 0.004$ |
|            | 40   | $0.919 \pm 0.176$ | $2.128 \pm 0.369$ | $0.005 \pm 0.001$ | $0.015 \pm 0.003$ |                   |

Hyphen: no aflatoxin synthesis detected. Averages  $\pm$  standard deviation.  $n = 4$ .
